# Supplementary material
Source: MDPI journal article supplement (https://www.mdpi.com/2071-1050/4/9/2334)
Supplement: s1 [file s1]

Article

# Riparian Forest Restoration: Conflicting Goals, Trade-Offs, and Measures of Success

Heather L. Bateman <sup>1,\*</sup>, David M. Merritt <sup>2</sup> and J. Bradley Johnson <sup>3</sup>

<sup>1</sup> Arizona State University, Polytechnic Campus, 6073 S Backus Mall, Mesa, AZ 85212, USA

<sup>2</sup> USFS Watershed, Fish, and Wildlife & CSU Natural Resource Ecology Laboratory NRRC, Fort Collins, CO 80526, USA; E-Mail: dmmerritt@fs.fed.us

<sup>3</sup> Colorado State University, Department of Biology, Fort Collins, CO 80526, USA; E-Mail: bjohnson@lamar.colostate.edu

\* Author to whom correspondence should be addressed; E-Mail: heather.bateman@gmail.com; Tel.: +1-480-727-1131; Fax: +1-480-727-1236.

## Supplementary Material

**Table 1.** Species of amphibians and reptiles documented in the riparian forest and associated habitats (including ditches, canals, ponds, sandbars, and drier peripheral riparian habitat) of the Middle Rio Grande, New Mexico. An “X” indicates a species was encountered during the Rocky Mountain Research Station (RMRS) restoration project from 2000 to 2006 or from historical records. In the RMRS columns subscripts indicate the number of sites where the species occurred and superscripts indicate the number sites where the species was “gained”. Letter superscripts found in the historic column represent the reference, which are listed below.

| Taxa Scientific Name                 | Common Name           | RMRS Pre Post               |                             | Historic                |
|--------------------------------------|-----------------------|-----------------------------|-----------------------------|-------------------------|
| Amphibians                           |                       |                             |                             |                         |
| <i>Ambystoma tigrinum</i>            | Tiger Salamander      | X <sub>1</sub>              | X <sub>2</sub> <sup>1</sup> | X <sup>M, H, D, S</sup> |
| <i>Bufo cognatus</i>                 | Great Plains Toad     | X <sub>2</sub>              | X <sub>8</sub> <sup>6</sup> | X <sup>M, H, D</sup>    |
| <i>Bufo punctatus</i>                | Red-spotted Toad      |                             | X <sub>1</sub> <sup>1</sup> | X <sup>HM</sup>         |
| <i>Bufo woodhousii</i>               | Woodhouse's Toad      | X <sub>12</sub>             | X <sub>12</sub>             | X <sup>M, H, D, S</sup> |
| <i>Pseudacris triseriata</i>         | Western Chorus Frog   | X <sub>1</sub> <sup>1</sup> |                             | X <sup>M, H, D</sup>    |
| <i>Rana blairi</i>                   | Plains Leopard Frog   |                             |                             | X <sup>M</sup>          |
| <i>Rana catesbeiana</i> <sup>*</sup> | American Bullfrog     | X <sub>1</sub>              | X <sub>2</sub> <sup>2</sup> | X <sup>M, H, D</sup>    |
| <i>Rana pipiens</i>                  | Northern Leopard Frog |                             |                             | X <sup>M, HM, D</sup>   |
| <i>Scaphiopus couchii</i>            | Couch's Spadefoot     | X <sub>6</sub>              | X <sub>9</sub> <sup>3</sup> | X <sup>M, HM, D</sup>   |
| <i>Spea bombifrons</i>               | Plains Spadefoot      | X <sub>1</sub> <sup>1</sup> | X <sub>1</sub> <sup>1</sup> | X <sup>M, H</sup>       |

Table 1. Cont.

| Taxa Scientific Name                  | Common Name                      | RMRS Pre                    | Post                         | Historic                 |
|---------------------------------------|----------------------------------|-----------------------------|------------------------------|--------------------------|
| <i>Spea multiplicata stagnalis</i>    | New Mexico Spadefoot             | X <sub>6</sub>              | X <sub>7</sub> <sup>1</sup>  | X <sup>M, HM, D</sup>    |
| <b>Turtles</b>                        |                                  |                             |                              |                          |
| <i>Apalone spinifera</i>              | Spiny Softshell Turtle           | X <sub>1</sub> <sup>1</sup> |                              | X <sup>M, H, D</sup>     |
| <i>Chelydra serpentina serpentina</i> | Eastern Snapping Turtle          |                             |                              | X <sup>M, D</sup>        |
| <i>Chrysemys picta</i>                | Painted Turtle                   |                             |                              | X <sup>M, HM, D</sup>    |
| <i>Terrapene ornata</i>               | Ornate Box Turtle                |                             |                              | X <sup>M, HM, D</sup>    |
| <i>Trachemys gaigeae gaigeae</i>      | Big Bend Slider                  |                             |                              | X <sup>D</sup>           |
| <i>Trachemys scripta elegans</i>      | Red-eared Slider                 |                             |                              | X <sup>M, D</sup>        |
| <b>Lizards</b>                        |                                  |                             |                              |                          |
|                                       | Chihuahuan Spotted Whiptail      | X <sub>11</sub>             | X <sub>12</sub> <sup>1</sup> |                          |
| <i>Aspidoscelis exsanguis</i>         | Whiptail                         |                             |                              | X <sup>H, D, S</sup>     |
| <i>Aspidoscelis inornata</i>          | Little Striped Whiptail          | X <sub>1</sub>              | X <sub>1</sub>               | X <sup>H, D, S</sup>     |
| <i>Aspidoscelis neomexicana</i>       | New Mexico Whiptail              | X <sub>12</sub>             | X <sub>12</sub>              | X <sup>M, H, D</sup>     |
|                                       | Common Checkered Whiptail        | X <sub>2</sub>              | X <sub>2</sub>               |                          |
| <i>Aspidoscelis tessellata</i>        | Whiptail                         |                             |                              | X <sup>HM, D</sup>       |
| <i>Aspidoscelis tigris</i>            | Tiger Whiptail                   | X <sub>1</sub>              | X <sub>1</sub>               | X <sup>M, HM</sup>       |
|                                       | Desert Grassland Whiptail        | X <sub>6</sub> <sup>1</sup> | X <sub>6</sub> <sup>1</sup>  |                          |
| <i>Aspidoscelis uniparens</i>         | Whiptail                         |                             |                              | X <sup>M, HM, D, S</sup> |
| <i>Aspidoscelis velox</i>             | Plateau Striped Whiptail         |                             |                              | X <sup>H</sup>           |
| <i>Cophosaurus texanus</i>            | Greater Earless Lizard           |                             |                              | X <sup>D</sup>           |
| <i>Crotaphytus collaris</i>           | Collared Lizard                  |                             |                              | X <sup>D</sup>           |
| <i>Crotaphytus wislizeni</i>          | Leopard Lizard                   |                             |                              | X <sup>M</sup>           |
| <i>Eumeces obsoletus</i>              | Great Plains Skink               | X <sub>10</sub>             | X <sub>10</sub>              | X <sup>M, H, D, B</sup>  |
|                                       | Common Lesser Earless Lizard     |                             |                              |                          |
| <i>Holbrookia maculata</i>            | Lizard                           |                             |                              | X <sup>H</sup>           |
|                                       | Greater Short-horned Lizard      |                             |                              |                          |
| <i>Phrynosoma hernandesi</i>          | Lizard                           |                             |                              | X <sup>HM</sup>          |
| <i>Phrynosoma cornutum</i>            | Texas Horned Lizard              |                             | X <sub>1</sub> <sup>1</sup>  |                          |
|                                       | Pygmy Short-Tailed Horned Lizard |                             |                              |                          |
| <i>Phrynosoma douglasii</i>           | Horned Lizard                    |                             |                              | X <sup>M</sup>           |
|                                       | Round-tailed Horned Lizard       |                             |                              |                          |
| <i>Phrynosoma modestum</i>            | Lizard                           |                             |                              | X <sup>M, H, D</sup>     |
| <i>Sceloporus clarkii</i>             | Clark's Spiny Lizard             |                             |                              | X <sup>M</sup>           |
| <i>Sceloporus magister</i>            | Desert Spiny Lizard              | X <sub>1</sub>              | X <sub>1</sub>               | X <sup>M, HM, D</sup>    |
|                                       | Southwestern Fence Lizard        | X <sub>9</sub> <sup>1</sup> | X <sub>11</sub> <sup>3</sup> |                          |
| <i>Sceloporus cowlesi</i>             | Lizard                           |                             |                              | X <sup>M, H, D, S</sup>  |
| <i>Urosaurus ornatus</i>              | Ornate Tree Lizard               |                             |                              | X <sup>D</sup>           |
|                                       | Common Side-blotched Lizard      | X <sub>2</sub>              | X <sub>2</sub>               |                          |
| <i>Uta stansburiana</i>               | Lizard                           |                             |                              | X <sup>M, H, D</sup>     |

Table 1. Cont.

| Taxa Scientific Name           | Common Name             | RMRS Pre                    | Post                        | Historic                 |
|--------------------------------|-------------------------|-----------------------------|-----------------------------|--------------------------|
| <b>Snakes</b>                  |                         |                             |                             |                          |
| <i>Arizona elegans</i>         | Glossy Snake            |                             | X <sub>2</sub> <sup>2</sup> | X <sup>M, H</sup>        |
| <i>Coluber constrictor</i>     | Eastern Racer           |                             | X <sub>1</sub> <sup>1</sup> | X <sup>HM, D</sup>       |
|                                | Western                 |                             | X <sub>3</sub> <sup>3</sup> |                          |
|                                | Diamond-backed          |                             |                             |                          |
| <i>Crotalus atrox</i>          | Rattlesnake             |                             |                             | X <sup>M, HM</sup>       |
| <i>Crotalus viridis</i>        | Prairie Rattlesnake     |                             | X <sub>3</sub> <sup>3</sup> | X <sup>M, HM</sup>       |
|                                | Western Hog-nosed       | X <sub>3</sub> <sup>1</sup> | X <sub>4</sub> <sup>2</sup> |                          |
| <i>Heterodon nasicus</i>       | Snake                   |                             |                             | X <sup>HM</sup>          |
| <i>Hypsiglena torquata</i>     | (Texas) Night Snake     |                             |                             | X <sup>M</sup>           |
| <i>Lampropeltis getula</i>     | Common Kingsnake        | X <sub>6</sub>              | X <sub>8</sub> <sup>2</sup> | X <sup>M, HM, D, S</sup> |
|                                | New Mexico              |                             |                             |                          |
| <i>Leptotyphlops dissectus</i> | Threadsnake             |                             |                             | X <sup>D</sup>           |
| <i>Masticophis flagellum</i>   | Coachwhip               | X <sub>3</sub> <sup>3</sup> | X <sub>2</sub> <sup>2</sup> | X <sup>M, HM</sup>       |
| <i>Pituophis catenifer</i>     | Gophersnake             | X <sub>5</sub> <sup>2</sup> | X <sub>6</sub> <sup>3</sup> | X <sup>M, HM, D</sup>    |
| <i>Rhinocheilus lecontei</i>   | Long-nosed Snake        |                             |                             | X <sup>M, HM</sup>       |
| <i>Sistrurus catenatus</i>     | Massasauga              |                             |                             | X <sup>HM</sup>          |
|                                | Plains Black-headed     | X <sub>2</sub> <sup>1</sup> | X <sub>5</sub> <sup>4</sup> |                          |
| <i>Tantilla nigriceps</i>      | Snake                   |                             |                             | X <sup>M, HM, S</sup>    |
|                                | Black-necked            |                             |                             |                          |
| <i>Thamnophis cyrtopsis</i>    | Gartersnake             |                             |                             | X <sup>HM, D</sup>       |
| <i>Thamnophis elegans</i>      | Terrestrial Gartersnake | X <sub>1</sub> <sup>1</sup> |                             | X <sup>M, D</sup>        |
| <i>Thamnophis marcianus</i>    | Checkered Gartersnake   | X <sub>1</sub>              | X <sub>2</sub> <sup>1</sup> | X <sup>M, HM, D</sup>    |
| <i>Thamnophis sirtalis</i>     | Common Gartersnake      | X <sub>3</sub>              | X <sub>4</sub> <sup>1</sup> | X <sup>M, HC, D</sup>    |

Reference codes are as follows: H = captured by Hink and Ohmart [1], HM = museum records and other observations reported in Hink and Ohmart [1] Appendix 2, D = habitat associations from Degenhardt *et al.* [2], S = captures by Stuart *et al.* [3] at BDANWR. M = Museum of Southwestern Biology georeferenced data from a 400 m buffer around the Rio Grande in Bernalillo, Valencia, and Socorro Counties, 705 records (1938–1995);

\* Species considered non-native, introduced.

## References

1. Hink, V.C.; Ohmart, R.D. *Middle Rio Grande Biological Survey*; Final Report to the U.S. Army Corps of Engineers Contract No. DACW47-81-C-0015; Center for Environmental Studies, Arizona State University: Tempe, AZ, USA, 1984; p. 193.
2. Degenhardt, W.G.; Painter, C.W.; Price, A.H. *Amphibians and Reptiles of New Mexico*; University of New Mexico Press: Albuquerque, NM, USA, 1996.
3. Stuart, J.N.; Farley, G.H.; Valdez, E.W.; Bogan, M.A. *Studies of Vertebrates in Selected Riparian and Aquatic Habitats on Bosque del Apache National Wildlife Refuge, New Mexico*; U.S. Fish and Wildlife Service: Albuquerque, NM, USA, 1995.
